# Supplementary material
Source: MDPI journal article supplement (https://www.mdpi.com/2039-4713/13/4/44)
Supplement: s1 [file s1]

## Supporting Information

**Authors:** Mi Zhou, Hirofumi Yanai, Chee Kong Yap, Christina Emmanouil and Hideo Okamura

**Manuscript title:** Anthropogenic Microparticles in Sea-Surface Microlayer in Osaka Bay, Japan

**Table S1** Sampling date, sites and water temperature

| Date       | Sampling site | Latitude    | Longitude    | Weather | S-SML water temperature (°C) | Bulk water temperature (°C) |
|------------|---------------|-------------|--------------|---------|------------------------------|-----------------------------|
| 15/9/2021  | 3             | 34°38.085'N | 135°26.748'E | Sunny   | 26.6 (10 cm depth)           | 26.4                        |
|            | 7             | 34°37.662'N | 135°22.834'E | Cloudy  | 26 (10 cm depth)             | 26.0                        |
|            | 5             | 34°35.639'N | 135°14.259'E | Cloudy  | 28.4                         | 28.1                        |
| 15/11/2021 | 8             | 34°33.308'N | 135°12.590'E | Sunny   | 19.3                         | 20.1                        |
|            | 4             | 34°35.014'N | 135°08.558'E | Sunny   | 19.2                         | 20.3                        |
|            | 1             | 34°38.310'N | 135°10.361'E | Sunny   | 18.4                         | 18.2                        |
| 6/12/2021  | 5             | 34°35.669'N | 135°13.980'E | Cloudy  | 15.3                         | 15.4                        |
|            | 6             | 34°38.355'N | 135°17.157'E | Cloudy  | 16.8                         | 16.6                        |
|            | 2             | 34°40.430'N | 135°23.542'E | Sunny   | 16.9                         | 16.4                        |
| 11/1/2022  | 8             | 34°33.322'N | 135°12.575'E | Rainy   | 10.3                         | 16.0                        |
|            | 5             | 34°35.602'N | 135°14.030'E | Sunny   | 34.0                         | 30.0                        |
| 5/9/2022   | 7             | 34°37.558'N | 135°22.965'E | Sunny   | 32.5                         | 30.5                        |
|            | 3             | 34°37.987'N | 135°26.942'E | Rainy   | 31.0                         | 30.2                        |
| 5/10/2022  | 5             | 34°35.553'N | 135°13.926'E | Cloudy  | 23.7                         | 24.6                        |
|            | 6             | 34°39.121'N | 135°16.477'E | Cloudy  | 24.0                         | 24.8                        |
|            | 2             | 34°40.298'N | 135°25.529'E | Cloudy  | 24.1                         | 24.5                        |
| 24/10/2022 | 8             | 34°33.848'N | 135°12.253'E | Sunny   | 24.2                         | 22.6                        |
|            | 4             | 34°34.962'N | 135°08.546'E | Sunny   | 23.7                         | 23.3                        |
|            | 1             | 34°38.449'N | 135°10.496'E | Sunny   | 22.7                         | 22.7                        |
| 7/11/2022  | 7             | 34°37.472'N | 135°22.878'E | Sunny   | 20.6                         | 20.2                        |
|            | 3             | 34°38.012'N | 135°26.867'E | Sunny   | 21.6                         | 20.9                        |
|            | 2             | 34°40.266'N | 135°23.535'E | Sunny   | 22.3                         | 21.2                        |
| 1/6/2023   | 4             | 34°34.962'N | 135°08.558'E | Sunny   | 22.9                         | 21.3                        |
|            | 6             | 34°38.355'N | 135°16.477'E | Cloudy  | 22.4                         | 21                          |
|            | 7             | 34°37.662'N | 135°22.965'E | Cloudy  | 21.7                         | 22.7                        |

**Table S2** Parameters of water samplings

| Date       | Sampling site | S-SML volume (kg) | S-SML sampling time (min) | S-SML depth (μm) (cm) | Bulk water volume (kg) | S-SML pH | Bulk water pH | S-SML EC (S/m) | Bulk water EC (S/m) | S-SML TOC (ppm) | S-SML DOC (ppm) | Bulk water TOC (ppm) | Bulk water DOC (ppm) |
|------------|---------------|-------------------|---------------------------|-----------------------|------------------------|----------|---------------|----------------|---------------------|-----------------|-----------------|----------------------|----------------------|
| 15/9/2021  | 3             | 9.5               | -                         | 10                    | 11.3                   | 7.78     | 7.81          | 2.68           | 3.58                | 2.84            | 2.44            | 2.76                 | 2.30                 |
|            | 7             | 11.5              | -                         | 10                    | 10.1                   | 7.95     | 8.22          | 3.52           | 4.43                | 2.37            | 2.24            | 2.32                 | 1.92                 |
|            | 5             | 10.0              | 30                        | 47                    | 11.9                   | 8.51     | 8.43          | 4.09           | 4.28                | 2.90            | 2.67            | 2.09                 | 2.08                 |
| 15/11/2021 | 8             | 11.5              | 30                        | 54                    | 10.7                   | 8.32     | 8.56          | 4.89           | 4.88                | 3.92            | 2.81            | 3.72                 | 2.49                 |
|            | 4             | 11.8              | 23                        | 72                    | 11.5                   | 8.11     | 8.08          | 4.84           | 4.85                | 3.93            | 1.78            | 4.06                 | 3.82                 |
|            | 1             | 11.6              | 23                        | 71                    | 11.2                   | 7.07     | 7.98          | 4.53           | 4.58                | 1.96            | 1.12            | 3.61                 | 3.51                 |

| Date       | Sampling site | S-SML volume (kg) | S-SML sampling time (min) | S-SML depth (μm) | Bulk water volume (kg) | S-SML pH | Bulk water pH | S-SML EC (S/m) | Bulk water EC (S/m) | S-SML TOC (ppm) | S-SML DOC (ppm) | Bulk water TOC (ppm) | Bulk water DOC (ppm) |
|------------|---------------|-------------------|---------------------------|------------------|------------------------|----------|---------------|----------------|---------------------|-----------------|-----------------|----------------------|----------------------|
| 6/12/2021  | 5             | 9.7               | 30                        | 45               | 11.9                   | 8.50     | 8.71          | 3.70           | 3.77                | 46.16           | 29.73           | 32.34                | 22.21                |
|            | 6             | 9.9               | 30                        | 46               | 12.3                   | 8.16     | 8.11          | 3.71           | 3.63                | 29.19           | 23.12           | 40.82                | 24.55                |
| 11/1/2022  | 2             | 10.8              | 23                        | 66               | 11.8                   | 7.80     | 7.85          | 3.62           | 3.67                | 21.31           | 14.14           | 47.38                | 30.02                |
|            | 8             | 10.8              | 40                        | 38               | 12.2                   | 8.60     | 8.65          | 3.35           | 3.77                | 15.47           | 13.82           | 10.80                | 9.05                 |
| 5/9/2022   | 5             | 9.0               | 30                        | 42               | 9                      | 8.99     | 9.24          | 5.01           | 4.90                | 33.93           | 11.91           | 27.89                | 2.50                 |
|            | 7             | 9.3               | 23                        | 56               | 9.1                    | 9.37     | 9.09          | 3.45           | 4.53                | 24.21           | 5.26            | 14.49                | 2.74                 |
| 5/10/2022  | 3             | 10.5              | 20                        | 74               | 9.8                    | 9.45     | 9.06          | 2.87           | 3.37                | 20.71           | 20.47           | 8.98                 | 7.45                 |
|            | 5             | 10.3              | 22                        | 65               | 12.2                   | 8.39     | 8.39          | 4.90           | 4.87                | 0.94            | 0.25            | 0.53                 | 0.07                 |
| 24/10/2022 | 6             | 10.6              | 21                        | 71               | 12.5                   | 8.48     | 8.39          | 4.70           | 4.79                | 0.96            | 0.46            | 0.63                 | 0.13                 |
|            | 2             | 11.3              | 22                        | 72               | 11                     | 8.80     | 8.31          | 3.25           | 4.45                | 1.86            | 1.80            | 1.06                 | 0.44                 |
| 7/11/2022  | 8             | 10.5              | 20                        | 74               | 11.8                   | 8.35     | 8.34          | 4.90           | 4.86                | 0.67            | 0.53            | 0.95                 | 0.56                 |
|            | 4             | 11.0              | 18                        | 86               | 11.3                   | 8.41     | 8.43          | 4.92           | 4.90                | 0.33            | 0.14            | 0.29                 | 0.23                 |
| 1/6/2023   | 1             | 9.8               | 17                        | 81               | 10.1                   | 8.63     | 8.53          | 4.82           | 4.79                | 1.01            | 0.42            | 0.30                 | 0.25                 |
|            | 7             | 11.5              | 18                        | 90               | 12.1                   | 8.53     | 8.56          | 4.53           | 4.39                | 1.05            | 0.73            | 0.63                 | 0.36                 |
| 7/11/2022  | 3             | 10.2              | 18                        | 79               | 11.6                   | 8.47     | 8.52          | 3.29           | 3.71                | 1.08            | 0.81            | 1.02                 | 0.81                 |
|            | 2             | 11.3              | 18                        | 88               | 11.3                   | 8.22     | 8.23          | 4.08           | 4.51                | 2.58            | 1.41            | 1.47                 | 1.40                 |
| 1/6/2023   | 4             | 11.5              | 26                        | 87               | 11.1                   | 8.89     | 8.87          | 4.56           | 2.3                 | 20              | 1.36            | 19.5                 | 0.96                 |
|            | 6             | 11.5              | 19                        | 78               | 11.6                   | 9.17     | 9.24          | 2.92           | 4                   | 19.4            | 1.68            | 19.7                 | 1.09                 |
|            | 7             | 11.15             | 18                        | 86               | 11.85                  | 9.1      | 8.81          | 3.5            | 4.03                | 21.7            | 1.4             | 2.27                 | 1.28                 |

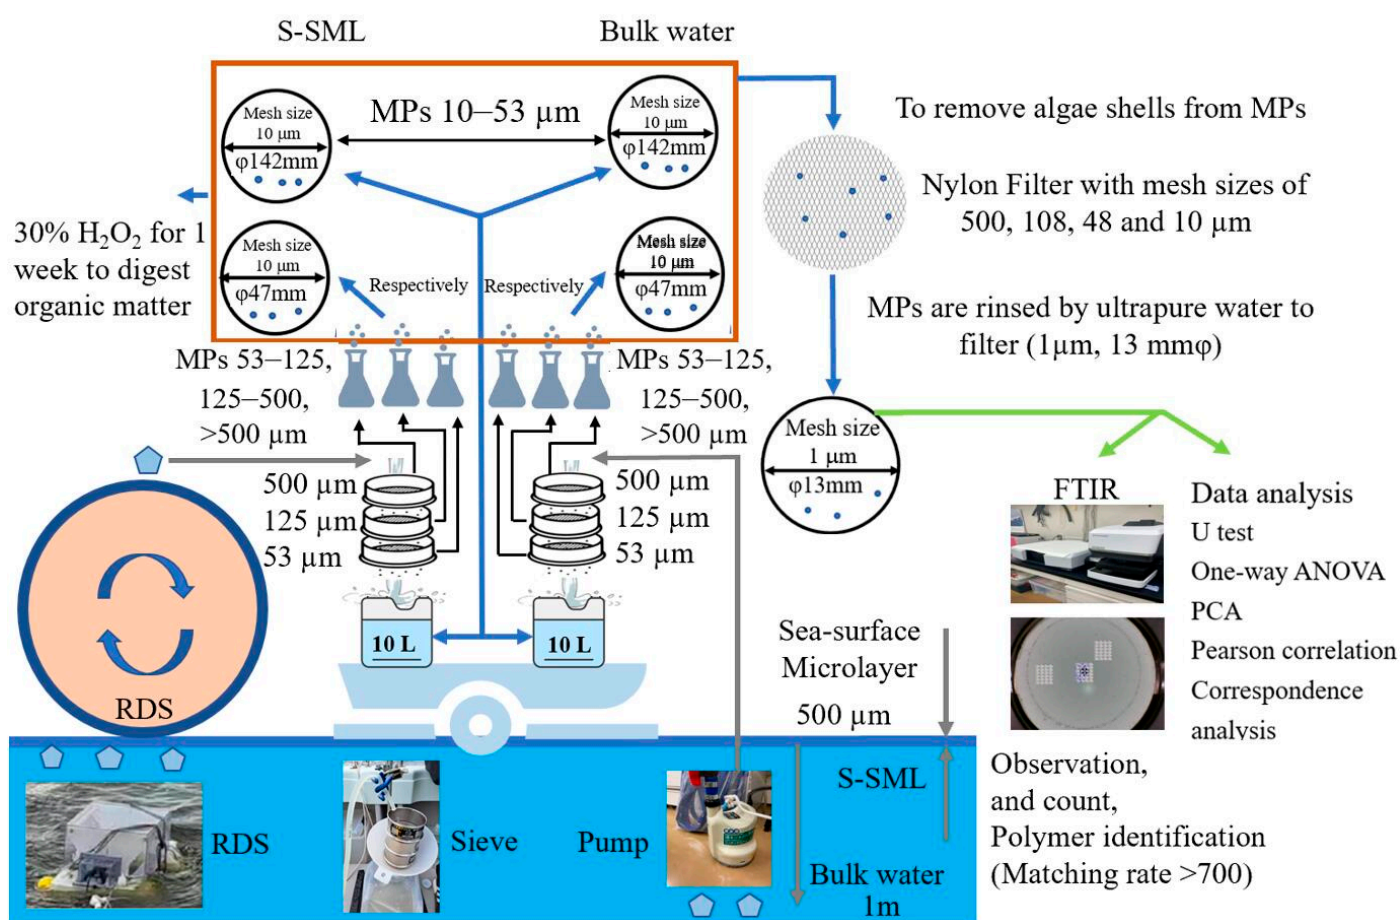

**Figure S1** Relevant filtering and dealing process of laboratory treatment

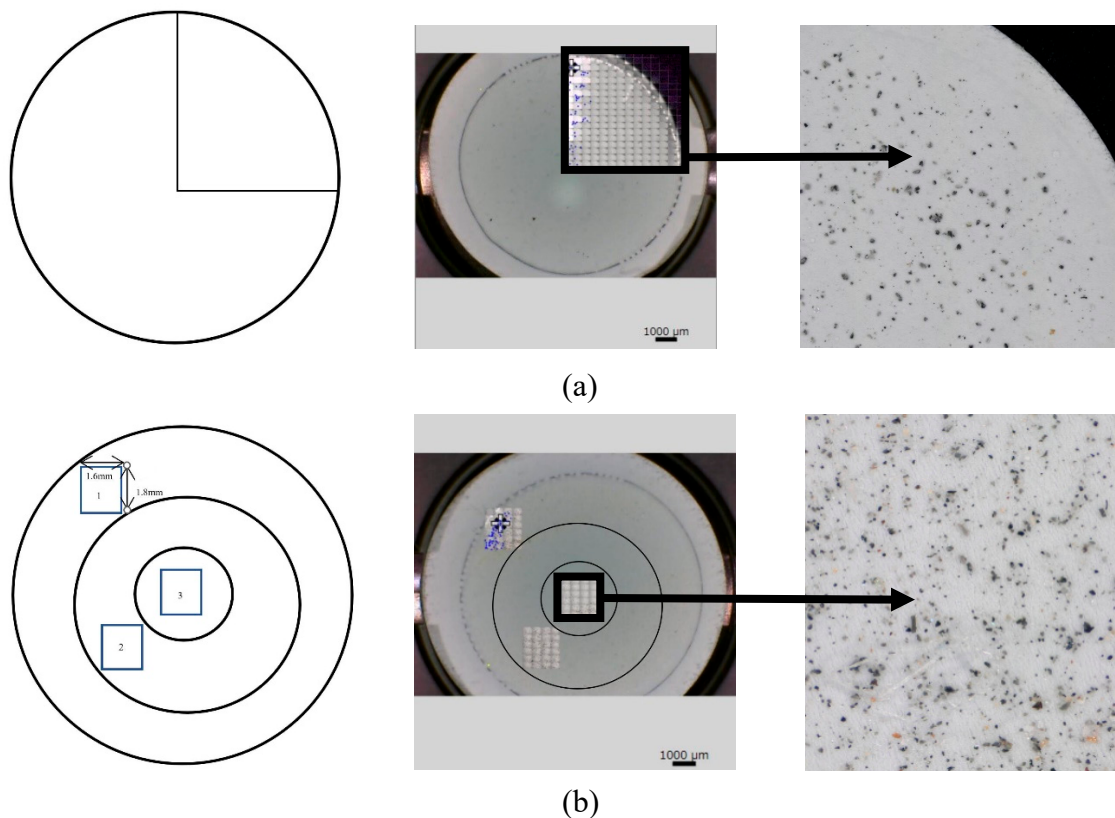

**Figure S2** Observing method of MPs on filters (a) MPs of >500, 125–500 and 53–125  $\mu\text{m}$  (b) MPs of 10–53  $\mu\text{m}$

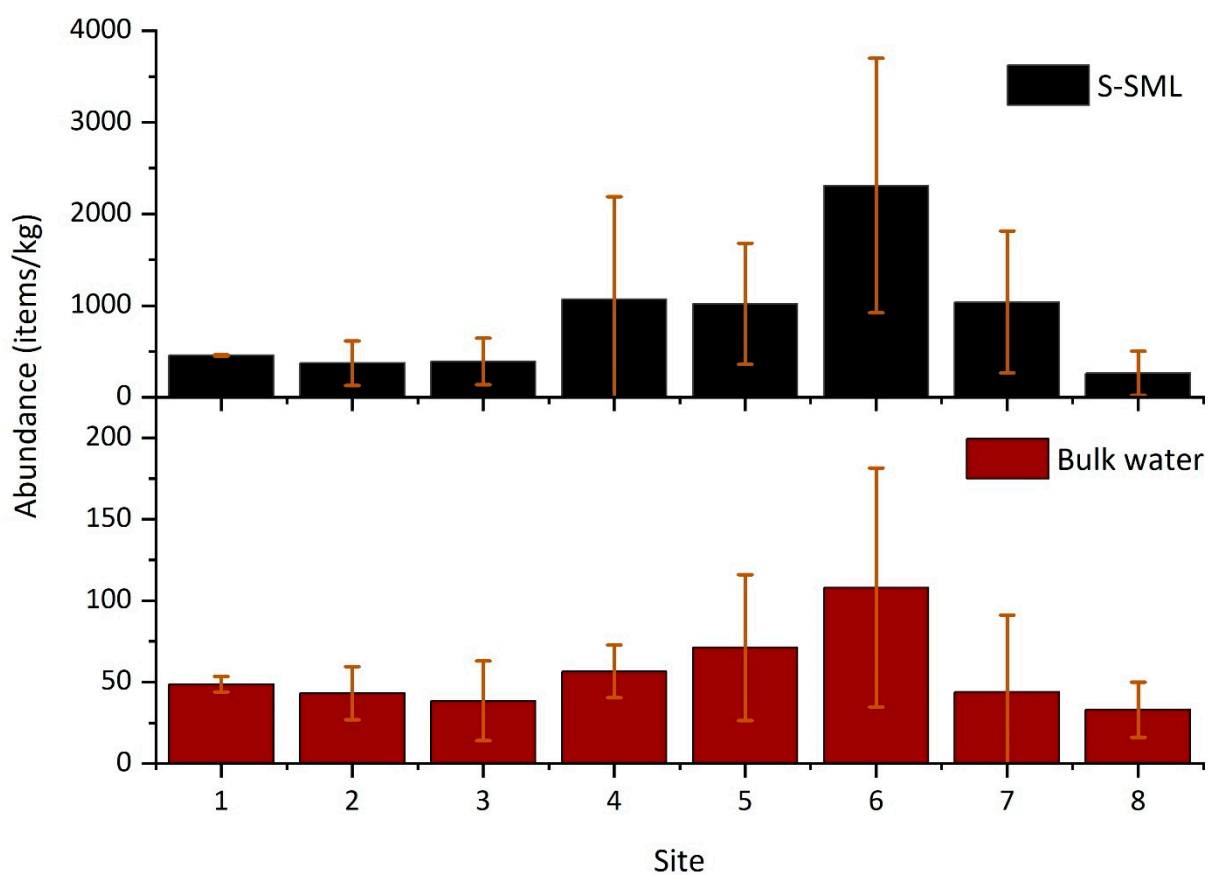

**Figure S3** Average abundance of MPs at different sampling sites

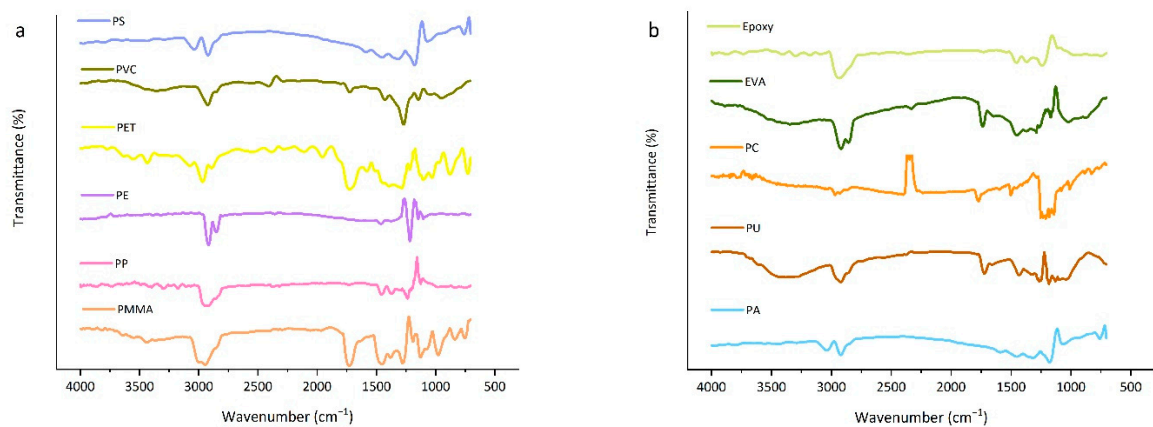

**Figure S4** FTIR spectra of polymer types of MPs

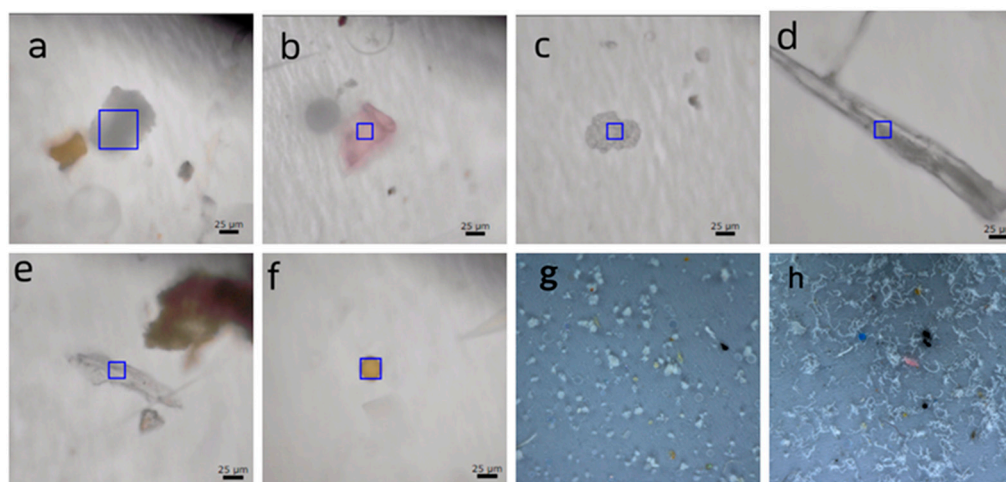

**Figure S5** Pictures of polymer types of MPs (a) PMMA (b) PP (c) PE (d) PET (e) PS (f) PA (g) PMMA fragment (h) PMMA fiber

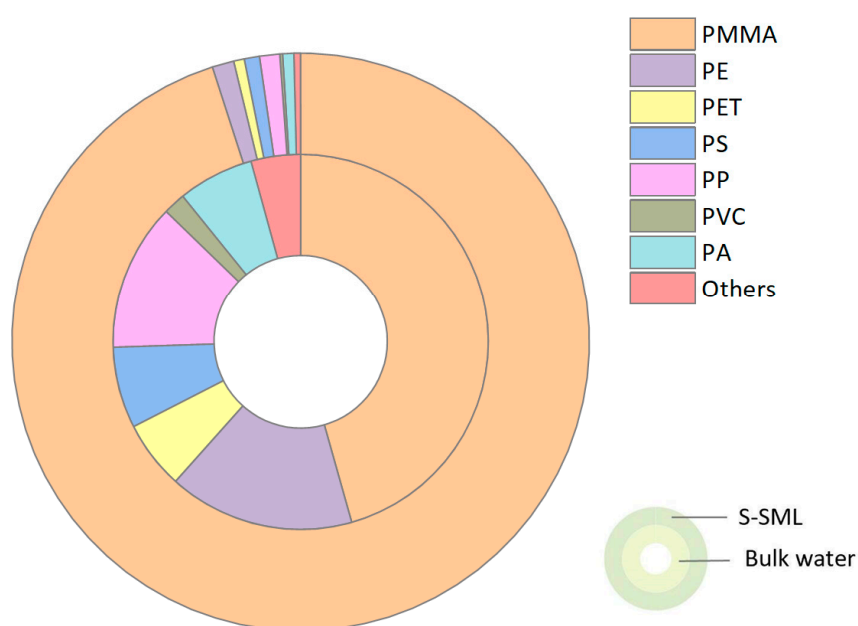

**Figure S6** Average percentage of every polymer type of MPs both in S-SML and bulk water

**Table S3** Parameter of two kinds of selected marine paint and antifouling paints

| No.     | Paint name                                           | Manufacture              | Polymer Type    | Metal |
|---------|------------------------------------------------------|--------------------------|-----------------|-------|
| Paint 1 | Sea Blue Acepaint for outer side and superstructures | Dainippon Paint Co., Ltd | PMMA            | Ti    |
| Paint 2 | CCP Cleaning                                         | Kanae paint Co., Ltd.    | Acrylic polymer | Cu Zn |

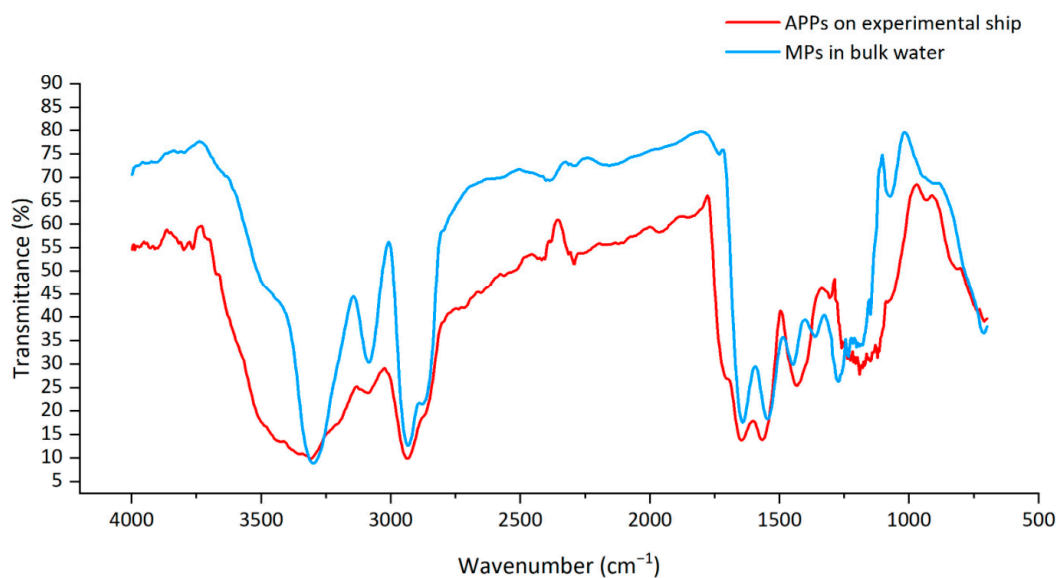**Figure S7** Spectra of APPs on experimental ship and MPs in bulk water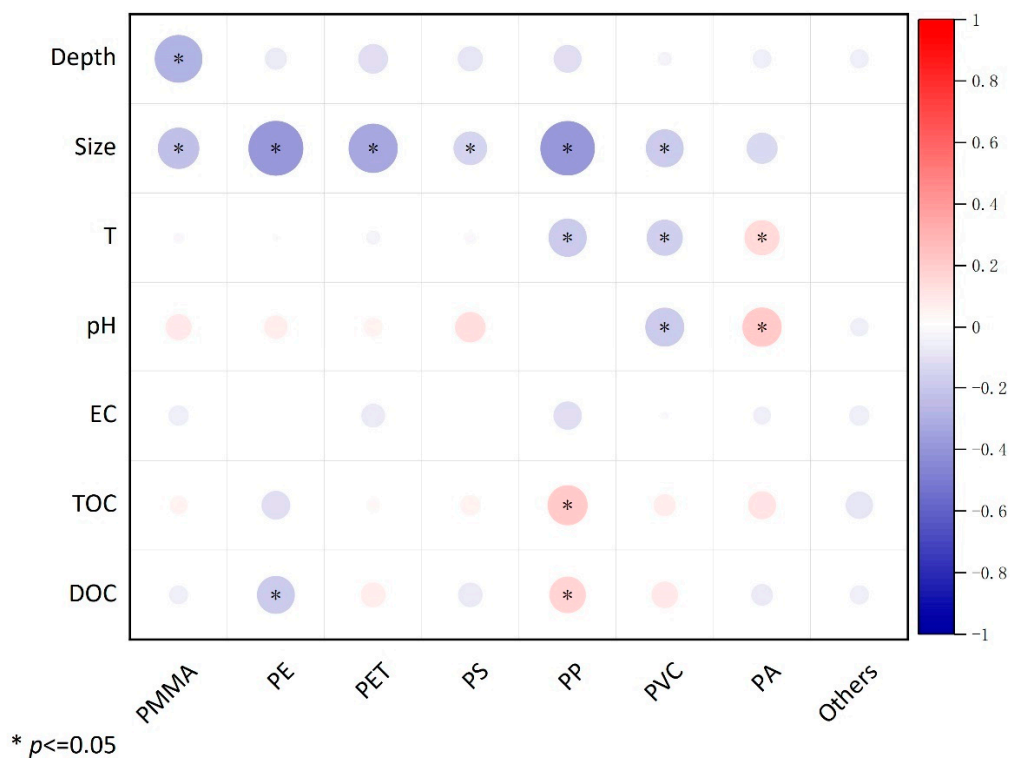**Figure S8** Correlation analysis between polymer abundances and seawater and MPs size factors



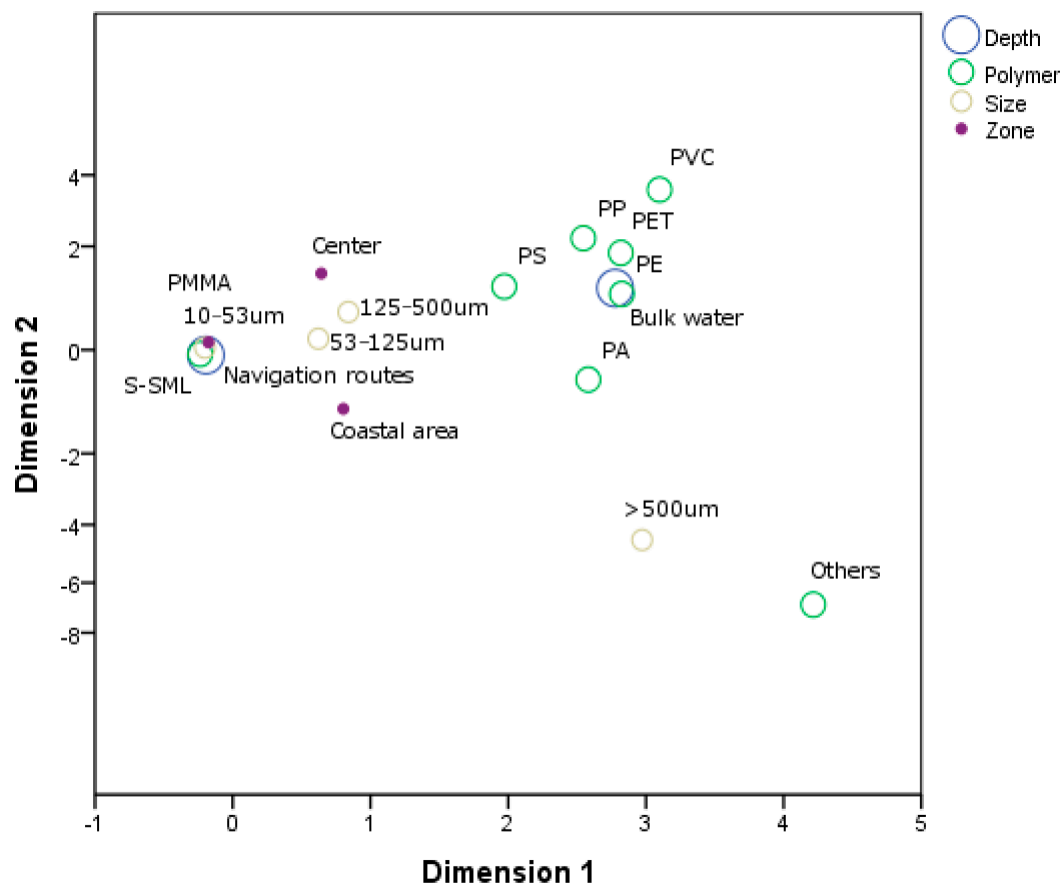

**Figure S9** Correspondence analysis among depth (S-SML and bulk water), abundance of MPs of all kinds of polymer, size and sampling zones –

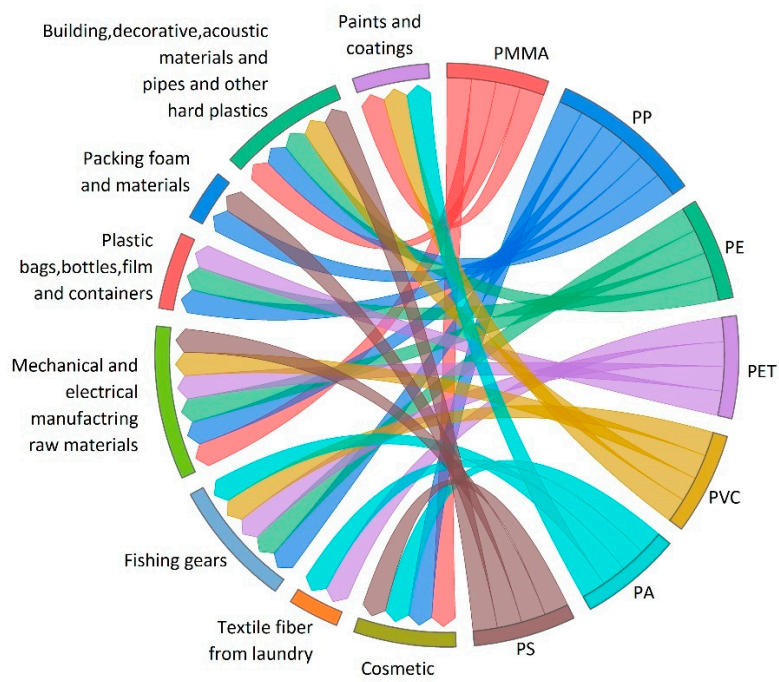

**Figure S10** Source of MPs of all polymer type
